# Supplementary material
Source: PubMed Central journal article supplement (PMC3231778)
Supplement: supp_139.1.203_DEV069971TableS1.pdf [file supp_139.1.203_DEV069971TableS1.pdf]

Table S1. Primers used in qRT-PCR and ChIP analyses

| qRT-PCR            |                             |                           |                           |
|--------------------|-----------------------------|---------------------------|---------------------------|
| Transcript (mouse) |                             | Forward primer (5' to 3') | Reverse primer (5' to 3') |
| <i>B2m</i>         |                             | ACTGACCGCCTGTATGCTA       | TGAAGGACATATCTGACATCTCTA  |
| <i>Wif1</i>        |                             | CAAAGAATGCCAGCCATTCC      | CAGCAAAGGGACATTGACAG      |
| <i>Prdm1</i>       |                             | CTGCCAACAAACAGCAAAGAG     | GGAATCCTCTCTGGAATAG       |
| <i>Sox18</i>       |                             | GAAGAGAGCAGCCTCATTTT      | CATATGCGAAAGGAAGGGAG      |
| <i>Lhx2</i>        |                             | CAGATCTGGCAGCTTACAAC      | CTGCTTCAAGTCCTTGGCAT      |
| <i>Apcdd1</i>      |                             | CTACCCAGAGGGTGTCTAC       | CAATGGTCAGGTCAGCCTTG      |
| <i>Dkk4</i>        |                             | CTGTGTGAATGATGTTGCAC      | GTCAGAGGTTCTAAGACAGC      |
| <i>Sox21</i>       |                             | GATGTATAGGTGTCAGGCAG      | GCAAAGCAAACACCAACTGC      |
| <i>Epyc</i>        |                             | GTATGATGCCATCTTGAGG       | CCTTGTCTTCATCTGGTTG       |
| <i>Calb1</i>       |                             | GTGGTTACCTGGAAGGAAAG      | GCATCGAAAGAGCAGCAAGA      |
| <i>Dcn</i>         |                             | CAAGAACCTGAAGGACTTGC      | GAAGTTCCTGGAGATTCTG       |
| <i>Lum</i>         |                             | CCTGGAGGTCAATGAACTTG      | CACTCATACATGTCAGGAGG      |
| <i>Tnc</i>         |                             | CAAAACCATCAGTACCACGG      | GGAGGGATATTTCTTGTGGC      |
| ChIP               |                             |                           |                           |
| Region (human)     | Position relative to exon 1 | Forward primer (5' to 3') | Reverse primer (5' to 3') |
| <i>WIF1</i> pR1    | -2878 to -2722              | agttgacttgcttagcacat      | gaatcaggcttgactctct       |
| <i>WIF1</i> pR2    | -2741 to -2531              | aggagagtcaagcctgattc      | tccagcacaggacacttaga      |
| <i>WIF1</i> pR3    | -2550 to -2397              | tctaagtgctctgtgctgga      | ttctctctaactcggttc        |
| <i>WIF1</i> pR4    | -2416 to -2181              | gaaaccgagtttaggagagaa     | ataatgccagtgtcaccag       |
| <i>WIF1</i> pR5    | -2069 to -1907              | aggaagaatcactgtgaagc      | ccagtaagttgactgtggat      |
| <i>WIF1</i> pR6    | -1895 to -1709              | ccttttctctgctagtaaa       | ttgagctatacaaccaacc       |
| <i>WIF1</i> pR7    | -1220 to -1060              | tttttgagagcggagtctcg      | gcaaaaattagctgggcatg      |
| <i>WIF1</i> pR8    | -908 to -767                | cagcaaacgtgaagatatcc      | acaccagcatttggggatt       |
| <i>WIF1</i> pR9    | -194 to +47                 | cttcccgctcttctgttct       | agggctgttcccgtttaga       |
| <i>WIF1</i> CDS    | Exon 4                      | GTTCAAGTTGGTTCCCATG       | GCATTTTGAGGTGTTGGAG       |
| <i>SOX18</i> pR1   | -2711 to -2565              | aactctgccttctgactgg       | aaaagagggcaggcagttca      |
| <i>SOX18</i> CDS   | Exon 2                      | ACGCGTGTATGTTGGTTCC       | ATGTAACCCTGGCAACTCT       |
| <i>LHX2</i> pR1    | -1677 to -1518              | caagtgcaggtataacgtgc      | caataacacagccagcacga      |
| <i>LHX2</i> CDS    | Exon 4                      | AACGAAAACGACGCAGAGCA      | TGCTTCAAGTCCTTGGCGT       |
| <i>APCDD1</i> pR1  | -2790 to -2620              | tcctcttccatcagcatg        | ttacgagaaccaagcctca       |
| <i>APCDD1</i> pR2  | -2639 to -2452              | tgaggcttgggttctcgtaa      | gaaaggaaaaggaagacatg      |
| <i>APCDD1</i> pR3  | -1567 to -1394              | gatttgcaaacaggagcaca      | acctgagaaatccatgggtg      |
| <i>APCDD1</i> pR4  | -1413 to -1232              | caccatggatttctcaggt       | aatgcctgatttccaagag       |
| <i>APCDD1</i> CDS  | Exon 2                      | TTCATCCAGACAGCAGGTCT      | CTCGATTGTAGGTGGCATCT      |
| <i>DKK4</i> pR1    | -861 to -725                | gacttggatccttgttctgc      | ccatthttcaatggtgggaac     |
| <i>DKK4</i> pR2    | -577 to -447                | tgatgcccagagctaatcag      | tggccaatgctatagagg        |
| <i>DKK4</i> CDS    | Exon 3                      | CTACGATGGAAGATGCAACC      | CCTTCTGCCTTGTGATTC        |
| <i>SOX21</i> pR1   | -2921 to -2760              | tagtgtaaaagctcaggac       | ccatattccttacaggctc       |
| <i>SOX21</i> pR2   | -2664 to -2494              | cacatagatgccactgctgt      | cacacacacacaaaagct        |
| <i>SOX21</i> pR3   | -2245 to -2069              | gctgtttgacttctgcatcg      | ctgctgaggtgaaggtgttt      |
| <i>SOX21</i> pR4   | -2088 to -1920              | aaacaccttcacctcagcag      | ccagactgagagatgcatc       |
| <i>SOX21</i> CDS   | Exon 1                      | ACAACCTCGGAGATCAGCAAG     | CGAACTTGTCTTCTTGTGAGC     |
